## The Relationship between Democracy embracement and COVID-19 reported casualties worldwide

**Muhammad R. Hussein**<sup>1</sup>, MBBCh MBA, **Thamer ALSulaiman**<sup>2</sup>, Ph.D. MSc, **Mohamed Habib**<sup>3</sup>, MSc, **Engy A. Awad**<sup>4</sup>, BSc, **Islam Morsi**<sup>5</sup>, MBBCh, **John R. Herbold**<sup>6</sup>, DVM, MPH, Ph.D., DACVPM, DACAW, FACE, FNAP

### 1 **Abstract:**

#### 2 Background:

3 The COVID-19 toll of cases and deaths followed an uneven pattern across the world. The literature has  
4 partly explained the observed discrepancy between the different countries by country-specific and  
5 systemic patterns worldwide. In this study, we propose an additional explanation that the magnitude of  
6 COVID-19 toll reported to the WHO could be influenced by the level of free speech and Democracy in  
7 the reporting countries.

#### 8 Methods:

9 We constructed a longitudinal dataset including the daily COVID-19 count of cases and deaths  
10 worldwide and each country's respective score on the Freedom in the World index. We applied two  
11 Generalized Estimating Equation models to investigate if a country's reported toll count of COVID-19  
12 cases and deaths is related to that country's freedom level. We controlled for factors identified in the  
13 current literature to affect the pandemic's spread.

#### 14 Results:

15 A country's score on the Freedom In the World Index was associated with its reported COVID-19 cases  
16 count (57028.43, 95% CI 985.3619 - 113071.5, P= 0.0461) and deaths count (3473.273, 95%  
17 CI1217.12-5729.42, P=.002). Also, despite having almost equal shares of the world's population,  
18 countries at the bottom category of the Freedom index reported 21% and 11% of the COVID-19 toll  
19 cases and death counts reported by countries of highest scores on the index, respectively.

#### 20 Conclusions:

21 The known magnitude of the COVID-19 pandemic's morbidity and mortality appears to be as  
22 transparent as the reporting countries uphold free speech and Democracy. This pattern could  
23 potentially misguide international aid and global vaccine distribution plans.

24

25 **Introduction:**

26 Concurrent to the news on COVID-19 vaccines, the question has arisen on the order of priority in  
27 distributing them. On the national level in the United States, the CDC was prompt to establish  
28 broad vaccine distribution phases.<sup>1</sup> On the international level, the debate is escalating on balance  
29 between some countries' financial ability to secure their vaccine supplies and the needs of mid  
30 and low-income countries.<sup>2</sup> A critical, yet not fully verified, assumption basing many of the  
31 involved public health and logistic considerations is that the information we have on the COVID19  
32 global spread is independent and transparent enough to be an accurate representation of its real  
33 impact. In this research, we examined the validity of this assumption on the global level.

34 Since the beginning of the epidemic, multiple factors cast doubt on the COVID-19 toll calculations'  
35 accuracy in different countries. There was a lack of consistency in selecting high-risk population  
36 groups that some countries initially monitored for COVID-19.<sup>3</sup> Government authorities  
37 worldwide used various combinations of clinical, epidemiological, and laboratory confirmation  
38 requirements to determine which cases constitute COVID-19 cases as the primary ailment.<sup>4</sup> The  
39 types, availability, and accuracy of the testing kits used in screening for COVID-19 varied  
40 worldwide at different time points. Eventually, most countries used various diagnostic tools of  
41 different sensitivities though not all countries could always have enough testing kits.  
42 Manufacturing limitations sometimes added to the uncertainty on some of the available kits.<sup>5</sup>

43 Despite these considerable differences between the individual countries, there have been  
44 observable systematic patterns in the COVID-19 impact numbers on the national and  
45 international levels, revealing socio-economic challenges for minorities and disadvantaged  
46 populations. For example, in the US, minority populations were disproportionately impacted by  
47 the COVID-19 epidemic, prompting questions on the health equity considerations and barriers to  
48 care.<sup>6</sup> At the global level, other systemic patterns appeared in the COVID-19 toll of cases and  
49 deaths, such as the seemingly paradoxical observation that the epidemic could be spreading at  
50 higher rates in developed and prosperous countries than others of weaker health care  
51 infrastructure.<sup>7</sup>

52 Another observation, which the current literature has not fully explained yet, is the discrepancy  
53 between countries in their counts of COVID-19 cases and deaths.<sup>8</sup> The full explanation of this  
54 observation could reveal what makes a country more vulnerable to COVID-19 and which  
55 countries are the hotspots of the epidemic and logistic priorities in vaccine distribution.<sup>9</sup> The  
56 literature has proposed factors of weather, location, health care infrastructure, aging population,  
57 and others. These explanations could only partly decipher the epidemic's spread pattern.<sup>10</sup> In  
58 this study, we proposed an additional explanation that identifies a potential barrier to equitable  
59 channeling of support, including vaccines, to genuine need populations. Our research hypothesis  
60 is that the magnitude of a country's reported toll of COVID-19 cases and deaths could be under  
61 the influence of the degrees of Freedom of speech and Democracy that country embraces. The  
62 less a government upholds these governance elements, the lower impact it could be reporting  
63 about the epidemic in its people. The premises of this hypothesis are the inconsistent spread of  
64 COVID-19 across the globe without a full explanation, multiple media reports on governments  
65 considering independent reporting on COVID-19 as misinformation, and studies from  
66 independent research institutions highlighting a step up in governmental control and a decline in  
67 Democracy in around the world during the pandemic.<sup>11,12,13,14</sup>

68 On top of misguiding scientific efforts, this possibility would likely create a barrier to equitable  
69 access to the COVID-19 vaccines. The perceived low impact of the epidemic in some countries  
70 could mislead the distribution efforts championed by the international organizations and the  
71 vaccine manufacturers into deprioritizing sending vaccine aid to these populations, contrary to  
72 their actual need.

73 To investigate this hypothesis, we conducted this longitudinal analysis of the potential  
74 relationship between the toll of cases and deaths reported by the world countries and their  
75 respective scores on the Freedom In the World Index, recognized in the politico-economic  
76 literature as a measure of Democracy and Free speech around the globe.

77 **Study Data And Methods:**

78 The observation unit was daily country. We collected records of confirmed COVID-19 impact  
79 reported to the WHO from world countries. Our study dataset tracked 182 countries over 242  
80 days from January 23, 2020, to September 20, 2020.

81 Outcome of Interest:

82 We examined the cumulative daily counts of confirmed COVID-19 cases and deaths from the  
83 COVID-19 dashboard provided by the Center for Systems Science and Engineering (CSSE) at Johns  
84 Hopkins University. This online repository hosts data on COVID-19 deaths and cases worldwide,  
85 collected from official and independent sources.

86 Predictor variable:

87 We used Freedom In the World Index (2020) to represent Democracy and Free speech in the  
88 world countries<sup>13</sup>. This annual index is developed by the US-based independent research  
89 institution Freedom House (US). The index is a composite score on a scale from one to a hundred,  
90 aggregating each country's sub-scores on a wide array of surveyed measures of Democracy such  
91 as political pluralism, Freedom of expression, the rule of law, and individual rights. Each country  
92 is also designated a Freedom In the World status (Free, Partly Free, or Not Free) based on its  
93 respective aggregate scores on Political Rights and Civil Liberties.<sup>15</sup>

94 Covariates:

95 We added control variables representing the different factors hypothesized in the current  
96 literature to influence the spread of COVID-19. The model included fixed effects for daily  
97 temperature and ultraviolet index levels, sourced from WeatherStack data repository, which  
98 collects worldwide weather data from stations worldwide.<sup>16</sup> Additionally, we added fixed effects  
99 of worldwide enactment of containment measures and public health policies, represented by  
100 daily records in Government Stringency Index developed by Oxford University s.<sup>17</sup>

101 We also added fixed effects for pollution levels (in mean annual exposure in micrograms per cubic  
102 meter, 2017),<sup>18</sup> population density (2019), and wealth (in the 2019 gross domestic product in  
103 PPP). We obtained this information from the World Bank Databank. Finally, we used the Health

104 Access and Quality Index (2016), which scores the accessibility of health care services in the  
105 different countries, as a proxy of the accessibility to care during the COVID-19 epidemic.

106 Methods:

107 We estimated the relationship between the countries' scores on the Freedom In the World index  
108 and their reported cumulative count of COVID-19 cases and deaths, using a Generalized  
109 Estimating Equation (GEE) model with an independent correlation structure. The model included  
110 the aforementioned covariates believed, in the consensus of literature in multiple scientific  
111 disciplines, to influence the global spread of COVID-19. We used SAS 9.4 TS Level 1 M6 to conduct  
112 the statistical analysis and impute the missing data. Although multiple imputations is not a  
113 required step for GEE models, for being population-based models, the consensus in Biostatistics  
114 literature is that imputing the missing data improves the adequacy of the GEE parameter  
115 estimates.

116 Results:

117 Descriptive statistics:

118 In the Free category, the highest scores on the Freedom In the World Index, there are 72  
119 countries. This category collectively hosts 38.28% of the world population and reported 72.37%  
120 of the world's COVID-19 caseload and 78.77% of the world's COVID-19 related deaths. Countries  
121 in this category produced 56.56% of the world's 2019 GDP in PPP and had an average score of  
122 76.94 on the Health Access and Quality index. (Figure 1)

123 In the Not Free category, the lowest scores category, there are 48 countries. They collectively  
124 host 36.3% of the world population and accounted for 15% of the total world COVID-19 cases  
125 and 8.7% of the total deaths. These countries produced 29.66% of the world GDP in PPP and had  
126 an average score of 51.81 on the Health Access and Quality index. (Figure 1)

127 Inferential statistics:

128 There was a statistically significant positive association between a country's score on the  
129 Freedom In the World Index and the cumulative count of cases that the government reported.

130 For every point decrease on the index, the average country reported 57028 less cumulative  
131 COVID-19 cases, and vice versa (57028.43, 95% CI 985.3619 - 113071.5, P= 0.0461). There was  
132 also a statistically significant positive association between a country's score on the index and the  
133 cumulative count of deaths it reported. For every point decrease on the index, the respective  
134 country reported 3473.27 less COVID-19 deaths, cumulative, over the study period (3473.273, 95%  
135 CI1217.12-5729.42, P=.002). (Figure 2)

136 Discussion:

137 The results suggest a relationship between the COVID-19 toll reported to the World Health  
138 Organization from the different countries and the respective countries' levels of Freedom. The  
139 less a country embraced Democracy and Free speech, the lower the magnitude of the COVID-19  
140 morbidity and mortality it reported to the world about its people. Countries in the Not Free  
141 category reported shares of global COVID-19 cases and deaths were 21% and 11% of the counts  
142 reported by the Free category, respectively, despite that the two categories have almost equal  
143 shares of the world population. Paradoxically, the Not Free category had poorer economy and  
144 weaker health care infrastructure, in terms of access and quality, than the Free category. This  
145 discrepancy is independent of the factors believed to influence the pandemic's spread, such as  
146 access to health care, containment measures and public health policies, weather conditions,  
147 pollution, demographic characteristics, or wealth.

148 These findings cast doubt on the validity of the assumption that the observed toll of COVID-19  
149 morbidity and mortality counts is transparent enough to represent the reality of the epidemic's  
150 impact accurately. Without a valid representation of the COVID-19 reality, scientific efforts could  
151 investigate inaccurate findings and drive unreliable conclusions, leading to a misallocation of  
152 global aid resources.

153 For example, the currently available information led some research efforts to investigate a  
154 perceived observation that the pandemic has not affected low-income countries as it did with  
155 high-income countries. One explanation was that rich countries could afford broader screening  
156 efforts, which will ultimately detect a higher number of cases than other countries. Yet, this

157 study's findings could propose an entirely different explanation considering that many low-  
158 income countries also have low embracement of Democracy.

159 Another example is the apparent association between colder temperatures and the spread of the  
160 virus, which led some to believe that the summer would restrain the epidemic early in the  
161 epidemic's timeline.<sup>19</sup> Some researchers suggest that this misperception probably deterred the  
162 COVID-19 response in the summer of 2020 by encouraging complacency in following social  
163 distancing measures, at least in part.<sup>20</sup> Yet, in the light of the findings in this study, we could  
164 consider the possibility that the low COVID-19 impact in hot countries in areas like Africa could  
165 be partially coming from a lack of Freedom of speech and low Democracy.

166 In future consideration, the perceived impact of the epidemic could be a key element in allocating  
167 international aid and vaccine quotas to developing countries. Considering the findings, the  
168 international organizations and vaccine manufacturers will likely deprioritize aid to some  
169 countries based on their low toll of COVID-19 cases and deaths, which could be, at least in part,  
170 because of a lack of transparency in reporting the reality of the COVID-19 situation in them. This  
171 role of lack of Democracy as a barrier against access to care could be a new socio-economic  
172 determinant of health care in the COVID-19 epidemic. Further research could help bridge this  
173 barrier by considering various cultural and socio-economic factors that could influence a  
174 country's government ability and willingness to help the international community get a realistic  
175 understanding of the epidemic. While such scientific inquiry goes beyond this study's scope, this  
176 study's findings could be a useful starting point for decision-makers and members of the research  
177 community working to promote equitable access to the global pool of therapeutic and preventive  
178 aid resources.

179 Limitations:

180 This study has several limitations. First, the inconsistencies between the standards that different  
181 countries have followed to varying points of time in the study period could introduce inaccuracies  
182 in the COVID-19 toll count of cases and deaths used in the analysis. Second, we did not obtain  
183 information on the availability of COVID-19 testing in different countries, which might shape the  
184 observed spread pattern. Third, the weather information used in the analysis is on each country's

185 political capital, which might not be fully representative of the weather in all that country's  
186 regions. Fourth, the study's analysis does not divulge the causality considerations underlying the  
187 findings, which could be an area for further research.

188 Declaration of Conflicting Interests:

189 The authors declared no potential conflicts of interest with respect to the research, authorship,  
190 and/or publication of this article.



## Figures

Figure 1

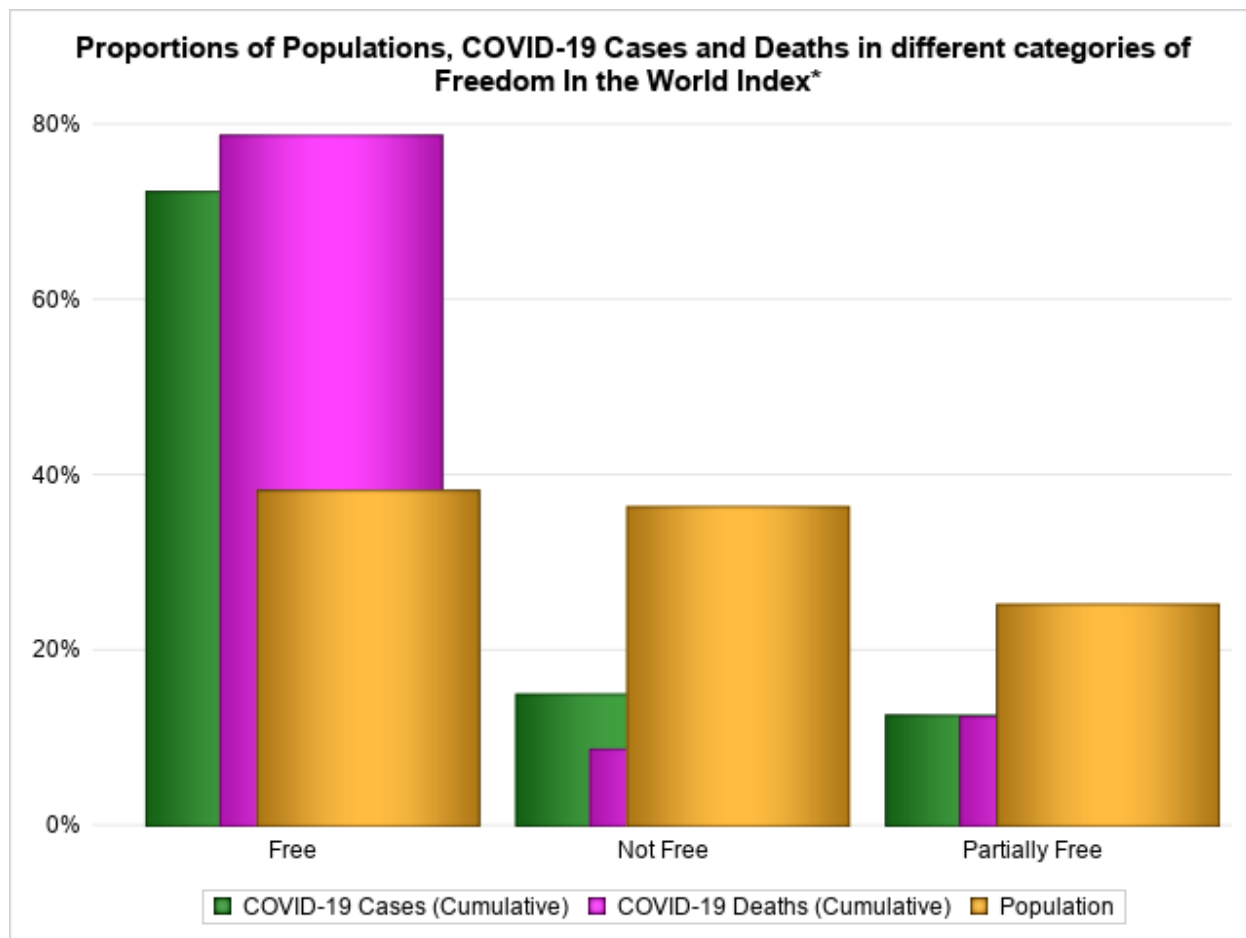

Figure 2:

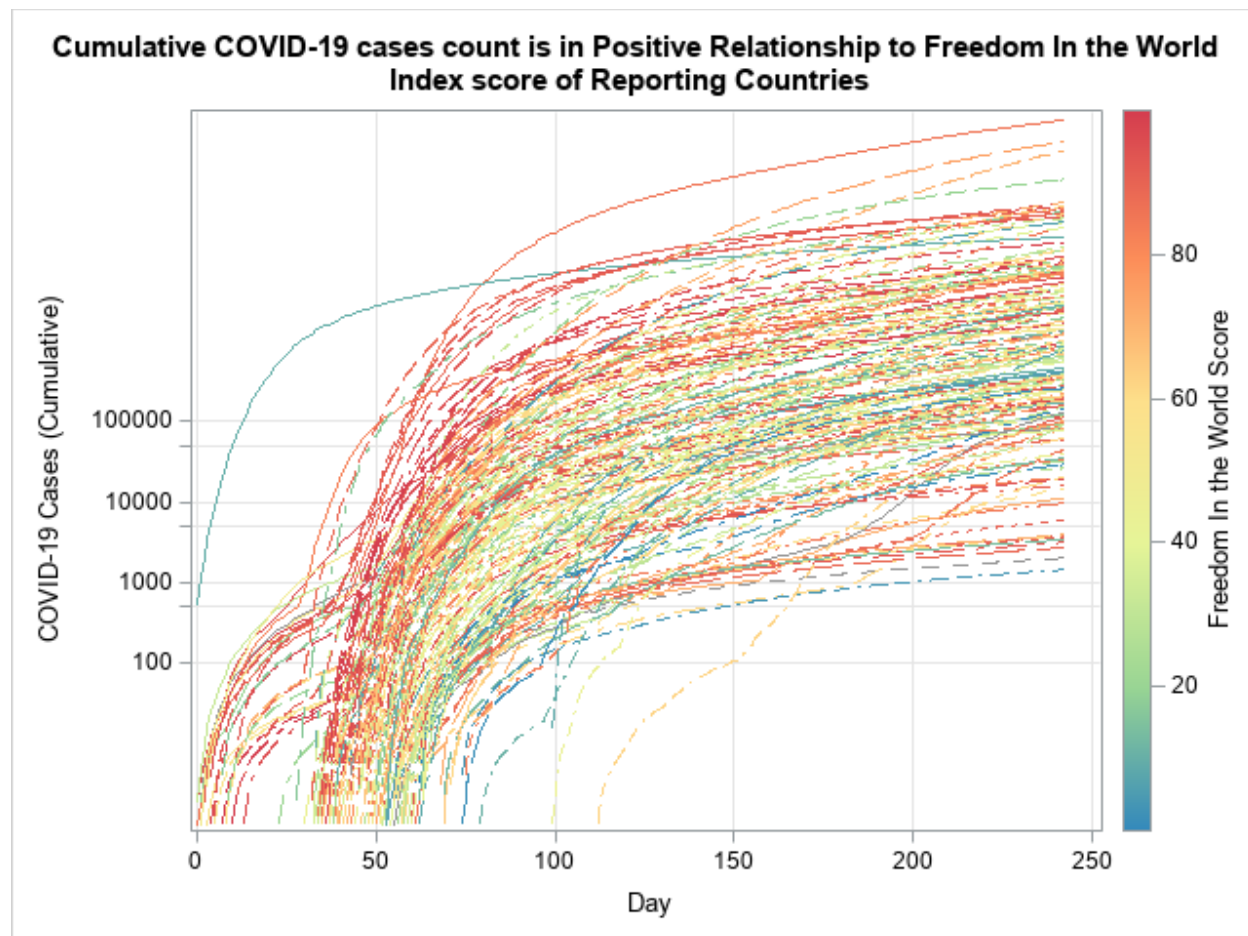

## References

1. Goodnough A. Who Will Get the Coronavirus Vaccine First? *New York Times*. <https://www.nytimes.com/2020/12/01/health/covid-vaccine-distribution-first.html>. Published December 1, 2020.
2. Mullard A. How COVID vaccines are being divvied up around the world. *Nature*. <https://www.nature.com/articles/d41586-020-03370-6>. Published November 30, 2020.
3. Johns Hopkins University. Mortality Analysis. <https://coronavirus.jhu.edu/data/mortality>.
4. European Centre for Disease Prevention and Control. Data on country response measures to COVID-19. <https://www.ecdc.europa.eu/en/publications-data/download-data-response-measures-covid-19>. Published 2020.
5. BBC News. Coronavirus: Why Egypt has faced criticism over antibody tests. <https://www.bbc.com/news/av/world-africa-53773978>. Published August .
6. CDC. Health Equity Considerations and Racial and Ethnic Minority Groups. <https://www.cdc.gov/coronavirus/2019-ncov/community/health-equity/race-ethnicity.html>. Published 2020. Accessed December 6, 2020.
7. Schellekens P, Sourrouille D. COVID-19 Mortality in Rich and Poor Countries : A Tale of Two Pandemics ? *World Bank Policy Res Work Pap*. 2020;(9260).
8. Sorci G, Faivre B, Morand S. Explaining among-country variation in COVID-19 case fatality rate. *Sci Rep*. 2020;10(1):1-11. doi:10.1038/s41598-020-75848-2
9. Schellekens, Philip; Sourrouille D. *The Unreal Dichotomy in COVID-19 Mortality between High-Income and Developing Countries*. <https://www.brookings.edu/blog/future-development/2020/05/05/the-unreal-dichotomy-in-covid-19-mortality-between-high-income-and-developing-countries/>.
10. Diop BZ, Ngom M, Poug   Biyong C, Poug   Biyong JN. The relatively young and rural population may limit the spread and severity of COVID-19 in Africa: A modelling study. *BMJ Glob Heal*. 2020;5(5). doi:10.1136/bmjgh-2020-002699
11. Freedom House. *A Leaderless Struggle for Democracy*.; 2020. <https://freedomhouse.org/report/freedom-world/2020/leaderless-struggle-democracy>.
12. Inter-Parliamentary Union. COVID-19 and Democracy: Can parliaments come to the rescue? <https://www.ipu.org/event/covid-19-and-democracy-can-parliaments-come-rescue#event-sub-page-22377/>. Published 2020.
13. Freedom House. Freedom in the World 2020. <https://freedomhouse.org/report/freedom-world/2020/leaderless-struggle-democracy>. Published 2020. Accessed September 21, 2020.
14. Casero-Ripoll  s A. Impact of Covid-19 on the media system. Communicative and democratic consequences of news consumption during the outbreak. *El Prof la Inf*. 2020;29(2). <http://www.elprofesionaldelainformacion.com/contenidos/2020/mar/casero.pdf>.
15. Freedom House. Freedom in the World Research Methodology. <https://freedomhouse.org/reports/freedom-world/freedom-world-research-methodology>. Published 2020.

16. Bukhari Q, Massaro JM, D'agostino RB, Khan S. Effects of weather on coronavirus pandemic. *Int J Environ Res Public Health*. 2020;17(15):1-12. doi:10.3390/ijerph17155399
17. University of Oxford Blavatnik School of Government. Coronavirus Government Response Tracker. <https://www.bsg.ox.ac.uk/research/research-projects/coronavirus-government-response-tracker>. Published 2020.
18. Wu X, Nethery RC, Sabath MB, Braun D, Dominici F. Air pollution and COVID-19 mortality in the United States: Strengths and limitations of an ecological regression analysis. *Sci Adv*. 2020;6(45):eabd4049. doi:10.1126/sciadv.abd4049
19. WebMD. Can Coronavirus Survive Heat? <https://www.webmd.com/lung/coronavirus-heat>. Accessed December 7, 2020.
20. Carlson CJ, Gomez ACR, Bansal S, Ryan SJ. Misconceptions about weather and seasonality must not misguide COVID-19 response. *Nat Commun*. 2020;11(1):2-5. doi:10.1038/s41467-020-18150-z
